# Supplementary material for: Biomolecular pleiomorphism probed by spatial interpolation of coarse models
Source: PubMed Central journal article supplement — Bioinformatics. 2008 Aug 30;24(21):2460–6. doi: 10.1093/bioinformatics/btn461 (PMC2732278; doi:10.1093/bioinformatics/btn461), 2008-08-30
Supplement: btn461_1.pdf [file btn461_1.pdf]

# Supplementary Tables

**Table 1.** Evaluation of the interpolation methods.

| System | Feature Vectors | Resolution of Map | Rigid Body   |      | Constrained | Splines |      |      |               |      |      |               |      |      | IDW     |      |      |        |      |      |
|--------|-----------------|-------------------|--------------|------|-------------|---------|------|------|---------------|------|------|---------------|------|------|---------|------|------|--------|------|------|
|        |                 |                   | Registration |      | MD          | TPS     |      |      | EBS Kernel 1† |      |      | EBS Kernel 2‡ |      |      | Global‡ |      |      | Local§ |      |      |
|        |                 |                   | RMSD         | CC   | CC          | RMSD    | CC   | Time | RMSD          | CC   | Time | RMSD          | CC   | Time | RMSD    | CC   | Time | RMSD   | CC   | Time |
| RNAP   | 15              | 15                | 6.65         | 0.86 | 0.88        | 3.17    | 0.88 | 0.3  | 3.83          | 0.87 | 1.0  | 3.26          | 0.88 | 1.0  | 1.81    | 0.88 | 0.2  | 1.79   | 0.88 | 0.3  |
| GroEL  | 112             | 14                | 6.11         | 0.96 | 0.96        | 4.01    | 0.93 | 5.3  | 3.34          | 0.96 | 21.0 | 3.70          | 0.97 | 21.0 | 2.75    | 0.95 | 3.3  | 2.71   | 0.95 | 3.7  |
| Myosin | 10              | 14                | 5.27         | 0.91 | 0.95        | 2.36    | 0.94 | 0.1  | 1.93          | 0.94 | 0.3  | 2.16          | 0.94 | 0.3  | 1.87    | 0.94 | 0.1  | 1.80   | 0.95 | 0.1  |

Map resolution shown in Å. RMSD measures the  $C_\alpha$  root-mean squared deviation (in Å) between interpolation-based model and constrained MD-based model. CC represents the cross-correlation coefficient to the experimental map. † elasticity coefficient  $\nu = 0.5$ . ‡ weighting power  $c = 8$ . § weighting power  $c = 4$ , and the radius of influence R encompassing nine feature vectors. Time represents the execution time (in seconds) on an Intel Core 2 duo, 2.4GHz, with 4GB RAM.

**Table 2.** Parameter robustness of IDW and effect of stereochemical idealization.  $C_\alpha$  RMSD in Å.

| System | Test 1† | Test 2‡ | Test 3§ | RefMac* |
|--------|---------|---------|---------|---------|
| RNAP   | 1.81    | 1.81    | 1.82    | 1.66    |
| GroEL  | 2.82    | 2.73    | 2.75    | 2.49    |
| Myosin | 1.82    | 1.82    | 1.87    | 1.71    |

† Local IDW, R holding 60% vectors, c set from 3-4 in 0.2 increments (average RMSD). ‡ Local IDW, R holding 50-90% vectors in 10% increments,  $c = 3.5$  (average RMSD). § Global IDW, c set from 7-9 in 0.4 increments (average RMSD). \* Local IDW, R holding 9 vectors and  $c = 4$ , post-processed with 20 iterations of RefMac (see text). The RMSD values are nearly identical to the values given in Supplementary Table 1.
